# Supplementary material
Source: PubMed Central journal article supplement (PMC2785681)
Supplement: supp_M109.047209_jbc.M109.047209-1.pdf [file supp_M109.047209_jbc.M109.047209-1.pdf]

## FIGURE LEGENDS TO SUPPLEMENTARY FIGURES

Supplementary Figure S1. Inhibition of PAX6 by siRNA reduces PAX6 RNA but not the unrelated gene, beta-2 microglobulin. RNA from untransfected (control/untreated), random siRNA transfected (siScramble), and PAX6 gene-specific siRNA (siPAX6) was collected 24 hr post transfection and used as template to make cDNA. These cDNAs were used as templates for PCR synthesis for beta2-microglobulin (lanes 1-7) and PAX6 (lanes 8-14) transcripts. PCR samples were amplified for 10 (lanes 1, 8), 20 (lanes 2, 9), 25 (lanes 3, 10), 30 (lanes 4, 11), 35 (lanes 5, 12) and 40 (lanes 6, 13) cycles. For each RNA sample, the reaction for producing cDNA was performed without reverse transcriptase (-RT) and this served as a negative control. This sample failed to amplify a band after 40 cycles for both primer sets (lanes 7, 14).
